# Supplementary material for: Prognostic Value of Flow‐Mediated Vasodilation in Brachial Artery and Fingertip Artery for Cardiovascular Events: A Systematic Review and Meta‐Analysis
Source: PubMed Central journal article supplement — J Am Heart Assoc. 2015 Nov 13;4(11):e002270. doi: 10.1161/JAHA.115.002270 (PMC4845238; doi:10.1161/jaha.115.002270), 2015-11-13
Supplement: JAH3-4-e002270-s001.pdf [file JAH3-4-e002270-s001.pdf]

## SUPPLEMENTAL MATERIAL

### Search strategies

#### Ovid

Database(s): Embase 1988 to 2014 Week 38, Ovid MEDLINE(R) In-Process & Other Non-

Indexed Citations and Ovid MEDLINE(R) 1946 to Present, EBM Reviews - Cochrane Central

Register of Controlled Trials August 2014, EBM Reviews - Cochrane Database of Systematic

Reviews 2005 to August 2014

Search Strategy:

| #  | Searches                                                                                                                                                                                                                                                                                                                                                                                                                 | Results      |
|----|--------------------------------------------------------------------------------------------------------------------------------------------------------------------------------------------------------------------------------------------------------------------------------------------------------------------------------------------------------------------------------------------------------------------------|--------------|
| 1  | exp endothelial dysfunction/di<br>(("flow mediated" adj3 (vasodilat* or dilat*)) or ((endothelial or endothelium)<br>adj3 (disease* or disorder* or dysfunction* or function) adj3 (test* or measur* or<br>2 assess* or diagnos*)) or ((endothelial or endothelium) and dependent and<br>(vasodilat* or dilat*)) or (vascular adj3 reactivit*) or EndoPAT or FMD or PAT<br>or "peripheral arterial tonometry").ti,ab,kw. | 265<br>58972 |
| 3  | 1 or 2                                                                                                                                                                                                                                                                                                                                                                                                                   | 59111        |
| 4  | mortality.fs.                                                                                                                                                                                                                                                                                                                                                                                                            | 430012       |
| 5  | exp death/                                                                                                                                                                                                                                                                                                                                                                                                               | 531703       |
| 6  | exp mortality/                                                                                                                                                                                                                                                                                                                                                                                                           | 893088       |
| 7  | exp survival/                                                                                                                                                                                                                                                                                                                                                                                                            | 617281       |
| 8  | Myocardial Infarction/                                                                                                                                                                                                                                                                                                                                                                                                   | 311798       |
| 9  | heart infarction/                                                                                                                                                                                                                                                                                                                                                                                                        | 160909       |
| 10 | exp angina pectoris/                                                                                                                                                                                                                                                                                                                                                                                                     | 111759       |
| 11 | exp Heart Failure/                                                                                                                                                                                                                                                                                                                                                                                                       | 362993       |

|                                                                                                                                                                                                                                                                                                                                                                                                                                                                                                                                                                                                                                                                                                                                                                                    |         |
|------------------------------------------------------------------------------------------------------------------------------------------------------------------------------------------------------------------------------------------------------------------------------------------------------------------------------------------------------------------------------------------------------------------------------------------------------------------------------------------------------------------------------------------------------------------------------------------------------------------------------------------------------------------------------------------------------------------------------------------------------------------------------------|---------|
| 12 exp Stroke/                                                                                                                                                                                                                                                                                                                                                                                                                                                                                                                                                                                                                                                                                                                                                                     | 174468  |
| 13 exp cerebrovascular accident/                                                                                                                                                                                                                                                                                                                                                                                                                                                                                                                                                                                                                                                                                                                                                   | 174468  |
| 14 exp Cerebrovascular Disorders/                                                                                                                                                                                                                                                                                                                                                                                                                                                                                                                                                                                                                                                                                                                                                  | 624331  |
| 15 exp brain infarction/                                                                                                                                                                                                                                                                                                                                                                                                                                                                                                                                                                                                                                                                                                                                                           | 77569   |
| 16 (((cardiovascular or cardiac or coronar* or cardial or myocardial or heart or brain or cerebral* or cortical or hemisph9 er* or cerebrovascular or cerebrum) adj3 ("blood flow disturbance*" or insult or insultus or attack* or event* or accident* or infarct* or failure* or arrest* or insufficien* or occlusion* or ischem* or ischaem* or injur*)) or ((heart or cardiac or myocardial) adj2 (decompensat* or incompetence)) or angina or anginal or apoplexia or apoplexy or "cardiorenal syndrome*" or "cardio-renal syndrome*" or death* or "decompensatio cordis" or fatalit* or "insufficiencia cordis" or "ischaemic seizure*" or "ischemic seizure*" or morbidit* or mortalit* or "paroxysmal dyspnea*" or stenocardia* or stroke or strokes or surviv*).ti,ab,kw. | 4542101 |
| 17 or/4-16                                                                                                                                                                                                                                                                                                                                                                                                                                                                                                                                                                                                                                                                                                                                                                         | 5555501 |
| 18 3 and 17                                                                                                                                                                                                                                                                                                                                                                                                                                                                                                                                                                                                                                                                                                                                                                        | 12212   |
| 19 exp evidence based medicine/                                                                                                                                                                                                                                                                                                                                                                                                                                                                                                                                                                                                                                                                                                                                                    | 723753  |
| 20 exp meta analysis/                                                                                                                                                                                                                                                                                                                                                                                                                                                                                                                                                                                                                                                                                                                                                              | 134550  |
| 21 exp Meta-Analysis as Topic/                                                                                                                                                                                                                                                                                                                                                                                                                                                                                                                                                                                                                                                                                                                                                     | 29679   |
| 22 exp "systematic review"/                                                                                                                                                                                                                                                                                                                                                                                                                                                                                                                                                                                                                                                                                                                                                        | 79705   |
| 23 exp controlled study/                                                                                                                                                                                                                                                                                                                                                                                                                                                                                                                                                                                                                                                                                                                                                           | 4521472 |
| 24 exp Randomized Controlled Trial/                                                                                                                                                                                                                                                                                                                                                                                                                                                                                                                                                                                                                                                                                                                                                | 724442  |
| 25 exp triple blind procedure/                                                                                                                                                                                                                                                                                                                                                                                                                                                                                                                                                                                                                                                                                                                                                     | 70      |
| 26 exp Double-Blind Method/                                                                                                                                                                                                                                                                                                                                                                                                                                                                                                                                                                                                                                                                                                                                                        | 343175  |
| 27 exp Single-Blind Method/                                                                                                                                                                                                                                                                                                                                                                                                                                                                                                                                                                                                                                                                                                                                                        | 51351   |
| 28 exp latin square design/                                                                                                                                                                                                                                                                                                                                                                                                                                                                                                                                                                                                                                                                                                                                                        | 276     |
| 29 exp Placebos/                                                                                                                                                                                                                                                                                                                                                                                                                                                                                                                                                                                                                                                                                                                                                                   | 268509  |
| 30 exp Placebo Effect/                                                                                                                                                                                                                                                                                                                                                                                                                                                                                                                                                                                                                                                                                                                                                             | 7242    |
| 31 exp comparative study/                                                                                                                                                                                                                                                                                                                                                                                                                                                                                                                                                                                                                                                                                                                                                          | 2462110 |
| 32 exp longitudinal study/                                                                                                                                                                                                                                                                                                                                                                                                                                                                                                                                                                                                                                                                                                                                                         | 1066223 |
| 33 exp prospective study/                                                                                                                                                                                                                                                                                                                                                                                                                                                                                                                                                                                                                                                                                                                                                          | 702575  |
| 34 exp clinical trial/                                                                                                                                                                                                                                                                                                                                                                                                                                                                                                                                                                                                                                                                                                                                                             | 1731040 |

|                                                                                                                                                                                                                                                                                                                                                                                                                                                                                                                                                                                                                                                                                                                                        |          |
|----------------------------------------------------------------------------------------------------------------------------------------------------------------------------------------------------------------------------------------------------------------------------------------------------------------------------------------------------------------------------------------------------------------------------------------------------------------------------------------------------------------------------------------------------------------------------------------------------------------------------------------------------------------------------------------------------------------------------------------|----------|
| 35 clinical study/                                                                                                                                                                                                                                                                                                                                                                                                                                                                                                                                                                                                                                                                                                                     | 53816    |
| <p>((evidence adj based) or (meta adj analys*) or (systematic* adj3 review*) or<br/> (control* adj2 study) or (control* adj2 trial) or (randomized adj2 study) or<br/> (randomized adj2 trial) or (randomised adj2 study) or (randomised adj2 trial) or<br/> (doubl* adj blind*) or (doubl* adj mask*) or (singl* adj blind*) or (singl* adj<br/> 36 mask*) or (tripl* adj blind*) or (tripl* adj mask*) or (trebl* adj blind*) or (trebl* 6893374<br/> adj mask*) or "latin square" or placebo or "comparative study" or "comparative<br/> survey" or "comparative analysis" or longitudinal* or prospectiv* or "clinical<br/> study" or "clinical trial" or ((study or trial or random* or control*) and<br/> compar*).ti,ab,kw.</p> |          |
| 37 or/19-36                                                                                                                                                                                                                                                                                                                                                                                                                                                                                                                                                                                                                                                                                                                            | 12475197 |
| 38 18 and 37                                                                                                                                                                                                                                                                                                                                                                                                                                                                                                                                                                                                                                                                                                                           | 7198     |
| 39 from 18 keep 7116-11686                                                                                                                                                                                                                                                                                                                                                                                                                                                                                                                                                                                                                                                                                                             | 4571     |
| <p>limit 39 to (clinical trial, all or clinical trial, phase i or clinical trial, phase ii or<br/> clinical trial, phase iii or clinical trial, phase iv or clinical trial or comparative<br/> 40 study or controlled clinical trial or meta analysis or multicenter study or 1053<br/> pragmatic clinical trial or randomized controlled trial) [Limit not valid in<br/> Embase,CCTR,CDSR; records were retained]</p>                                                                                                                                                                                                                                                                                                                 |          |
| 41 38 or 40                                                                                                                                                                                                                                                                                                                                                                                                                                                                                                                                                                                                                                                                                                                            | 7198     |
| 42 from 18 keep 11687-12212                                                                                                                                                                                                                                                                                                                                                                                                                                                                                                                                                                                                                                                                                                            | 526      |
| 43 38 or 40 or 42                                                                                                                                                                                                                                                                                                                                                                                                                                                                                                                                                                                                                                                                                                                      | 7273     |
| <p>limit 43 to (book or book series or editorial or erratum or letter or note or<br/> addresses or autobiography or bibliography or biography or comment or<br/> dictionary or directory or interactive tutorial or interview or lectures or legal<br/> 44 cases or legislation or news or newspaper article or overall or patient education 29<br/> handout or periodical index or portraits or published erratum or video-audio<br/> media or webcasts) [Limit not valid in Embase,Ovid MEDLINE(R),Ovid<br/> MEDLINE(R) In-Process,CCTR,CDSR; records were retained]</p>                                                                                                                                                             |          |
| 45 43 not 44                                                                                                                                                                                                                                                                                                                                                                                                                                                                                                                                                                                                                                                                                                                           | 7244     |
| 46 45 not (exp animals/ not exp humans/)                                                                                                                                                                                                                                                                                                                                                                                                                                                                                                                                                                                                                                                                                               | 5736     |
| 47 limit 46 to english language [Limit not valid in CDSR; records were retained]                                                                                                                                                                                                                                                                                                                                                                                                                                                                                                                                                                                                                                                       | 5390     |
| <p>limit 47 to ("all adult (19 plus years)" or "young adult (19 to 24 years)" or "adult<br/> 48 (19 to 44 years)" or "young adult and adult (19-24 and 19-44)" or "middle age 5069<br/> (45 to 64 years)" or "middle aged (45 plus years)" or "all aged (65 and over)" or</p>                                                                                                                                                                                                                                                                                                                                                                                                                                                          |          |

|                                                                                    |         |
|------------------------------------------------------------------------------------|---------|
| "aged (80 and over)") [Limit not valid in Embase,CCTR,CDSR; records were retained] |         |
| limit 48 to (adult <18 to 64 years> or aged <65+ years>) [Limit not valid in Ovid  |         |
| 49 MEDLINE(R),Ovid MEDLINE(R) In-Process,CCTR,CDSR; records were retained]         | 3592    |
| 50 (adult or adults or "middle aged").ti,ab,kw.                                    | 1805040 |
| 51 47 and 50                                                                       | 477     |
| 52 49 or 51                                                                        | 3658    |
| 53 remove duplicates from 52                                                       | 2169    |
